# Supplementary material for: The Northern Manhattan Caregiver Intervention Project: a randomised trial testing the effectiveness of a dementia caregiver intervention in Hispanics in New York City
Source: PubMed Central journal article supplement — BMJ Open. 2012 Sep 15;2(5):e001941. doi: 10.1136/bmjopen-2012-001941 (PMC3467593; doi:10.1136/bmjopen-2012-001941), 2012-09-15

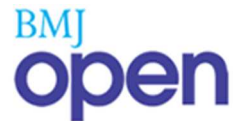

**The Northern Manhattan Caregiver Intervention Project (NOCIP): protocol for a randomized trial testing the effectiveness of a dementia caregiver intervention in Hispanics in New York City**

|                                 |                                                                                                                                                                                                                                                                                                                                                                                                                                                                                     |
|---------------------------------|-------------------------------------------------------------------------------------------------------------------------------------------------------------------------------------------------------------------------------------------------------------------------------------------------------------------------------------------------------------------------------------------------------------------------------------------------------------------------------------|
| Journal:                        | <i>BMJ Open</i>                                                                                                                                                                                                                                                                                                                                                                                                                                                                     |
| Manuscript ID:                  | bmjopen-2012-001941                                                                                                                                                                                                                                                                                                                                                                                                                                                                 |
| Article Type:                   | Protocol                                                                                                                                                                                                                                                                                                                                                                                                                                                                            |
| Date Submitted by the Author:   | 07-Aug-2012                                                                                                                                                                                                                                                                                                                                                                                                                                                                         |
| Complete List of Authors:       | Luchsinger, Jose; Columbia University, Department of Medicine<br>Mittelman, Mary; New York University, Psychiatry<br>Mejia, Miriam; Alianza Dominicana,<br>Lucero, Robert; Columbia University Medical Center, Nursing<br>Silver, Stephanie; Hebrew Home for the Aged, Research Division<br>Ramirez, Mildred; Hebrew Home for the Aged, Research Division<br>Kong, Jian; Hebrew Home for the Aged, Research Division<br>Teresi, Jeanne; Hebrew Home for the Aged, Research Division |
| <b>Primary Subject Heading</b>: | Mental health                                                                                                                                                                                                                                                                                                                                                                                                                                                                       |
| Secondary Subject Heading:      | Geriatric medicine, Nursing, Health services research                                                                                                                                                                                                                                                                                                                                                                                                                               |
| Keywords:                       | Dementia < NEUROLOGY, MENTAL HEALTH, Depression & mood disorders < PSYCHIATRY                                                                                                                                                                                                                                                                                                                                                                                                       |
|                                 |                                                                                                                                                                                                                                                                                                                                                                                                                                                                                     |

SCHOLARONE™  
Manuscripts

only

1  
2  
3 The Northern Manhattan Caregiver Intervention Project: a randomized trial testing the  
4 effectiveness of a dementia caregiver intervention in Hispanics in New York City.  
5  
6

7 - José Alejandro Luchsinger M.D., MPH, Departments of Medicine and Epidemiology,  
8 Columbia University Medical Center, New York, NY 10032, USA.  
9

10  
11 - Mary Mittelman, Dr. P.H, Department of Psychiatry, New York University, New York,  
12 NY 10016, USA  
13

14  
15 - Miriam Mejia, MA, Alianza Dominicana, New York, NY, USA.  
16

17  
18 - Stephanie Silver, MPH, Research Division – Hebrew Home for the Aged at Riverdale  
19 and Weill Cornell Medical College, Division of Geriatrics and Gerontology, New York,  
20 NY, USA.  
21  
22

23  
24 - Robert J. Lucero PhD, MPH, RN. School of Nursing, Columbia University Medical  
25 Center, New York, NY, USA.  
26  
27

28  
29 - Mildred Ramirez, Ph. D, Research Division – Hebrew Home for the Aged at Riverdale  
30 and Weill Cornell Medical College, Division of Geriatrics and Gerontology, New York, NY  
31 USA.  
32  
33

34  
35 - Jian Kong, M.S. Research Division – Hebrew Home for the Aged at Riverdale and Weill  
36 Cornell Medical College, Division of Geriatrics and Gerontology, New York, NY, USA.  
37

38  
39 - Jeanne A. Teresi, Ed.D., Ph.D, Research Division – Hebrew Home for the Aged at  
40 Riverdale and Weill Cornell Medical College, Division of Geriatrics and Gerontology,  
41 New York, NY, USA.  
42  
43  
44

45  
46 **Corresponding author:** José A. Luchsinger, MD MPH, PH9 Center, room 210, 630  
47 West 168<sup>th</sup> Street, New York, NY 10032, USA, Tel: 212-3054730, Fax: 212-3059349,  
48 Email: [jal94@columbia.edu](mailto:jal94@columbia.edu)  
49  
50

51  
52 **Keywords:** Dementia, Hispanics, caregiving, comparative effectiveness, randomized  
53 controlled trial.  
54  
55

56  
57 **Word Count:** 5718  
58  
59  
60

## ABSTRACT

**Introduction:** Dementia prevalence and its burden on families are increasing.

Caregivers of persons with dementia have more depression and stress than the general population. Several interventions have proven efficacy in decreasing depression and stress in selected populations of caregivers. Hispanics in New York City tend to have a higher burden of dementia caregiving compared to Non-Hispanic Whites because Hispanics have a higher prevalence of dementia, tend to have high family involvement, and tend to have higher psychosocial and economic stressors. Thus, we chose to test the effectiveness of a dementia caregiving intervention, the New York University Caregiver Intervention (NYUCI), with demonstrated efficacy in spouse caregivers in Hispanic relative caregivers of persons with dementia. Including the CHW intervention in both arms alleviates general psychosocial stressors and allows the assessment of the effectiveness of the intervention. Compared to two original efficacy studies of the NYUCI, which included only spouse caregivers, our study includes all relative caregivers including common law spouses, children, siblings, a nephew, and nieces. This study will be the first randomized trial to test the effectiveness of the NYUCI in Hispanic caregivers including non-spouses. **Methods and Analysis:** The design of the study is a randomized controlled trial. Participants are randomized to two arms: case management by a community health worker (CHW) and an intervention arm including the NYUCI in addition to case management by the CHW. The duration of intervention is 6 months. The main outcomes in the trial are changes in the Geriatric Depression Scale and the Zarit Caregiver Burden Scale from baseline to 6 months. **Ethics and Dissemination:** This trial is approved by the Columbia University Medical Center Institutional Review Board (AAAI0022), and funded by the National Institute on Minority Health and Health Disparities. The funding agency has no role in dissemination.

**Trial Registration:** [www.ClinicalTrials.gov](http://www.ClinicalTrials.gov) NCT01306695.

## Article Summary

Article focus: this article describes the rationale and protocol of an ongoing randomized trial testing a counseling intervention in Hispanic caregivers of persons with dementia.

### Key Messages:

- Our project is a randomized controlled trial.
- Our project is an example of comparative effectiveness research
- This study is the first randomized trial testing the NYU caregiver intervention in Hispanic caregivers

### Strengths and Limitations:

Strengths include the RCT design and rigorous analysis plan.

Relative limitations are relatively short duration and lack of power for subgroup analyses

## INTRODUCTION.

### Burden of dementia.

Dementia is an epidemic in our aging society. Dementia is a syndrome characterized by impairment of memory and other cognitive abilities severe enough to cause functional impairment (i.e. the ability to live independently)[1]. Dementia in this manuscript refers to late onset sporadic dementia, occurring mostly in persons 65 years and older. The most common dementia is Alzheimer's dementia (AD)[2 3], comprising between 70 to 90% of cases. The second most common cause is vascular dementia, caused by stroke[4], comprising between 5 and 25% of cases of dementia. Other causes of dementia such as fronto-temporal dementia and Lewy body disease are less common (<5% of cases).[3] Dementia prevalence increases after the age of 70 years[5], and its prevalence may

1  
2  
3 reach 50% in persons 85 years and older[6] . In 2011 the Alzheimer's Association  
4  
5 estimated that 5.4 million people have AD (1 in 8 older Americans), taken care of by 14.9  
6  
7 million unpaid caregivers, resulting in 183 billion dollars in annual costs. [3] The  
8  
9 prevalence of AD is expected to increase to 5.7 million in 2020, 7.7 million in 2030, and  
10  
11 11 million in 2040. Consequently, the number of family caregivers is increasing. Despite  
12  
13 our increasing understanding of dementia, particularly AD, no current known preventive  
14  
15 or curative measure exists[7]. AD is the sixth leading cause of death in the United  
16  
17 States, and the fifth for those aged 65 years and older [3] . In this context, dementia  
18  
19 prevalence and the number of family caregivers continues to increase with the aging of  
20  
21 the population.  
22  
23

#### 24 **Burden of dementia caregiving.**

25  
26 Caring for a person with AD or another dementia is challenging. In addition to memory  
27  
28 loss, dementia impairs judgment, orientation, and the ability to comprehend and  
29  
30 communicate. Personality and behavior are affected as well[8-10]. Individuals with  
31  
32 dementia require increasing levels of supervision and personal care as the disease  
33  
34 progresses, and many family caregivers experience isolation, high levels of stress and  
35  
36 problems with health, employment, income and financial security. The responsibilities  
37  
38 associated with caring for a family member with dementia places caregivers at risk for  
39  
40 psychological and physical illness.[11] Although caregivers may draw some satisfaction  
41  
42 from caregiving, they report high levels of emotional stress and depression[12 13].  
43  
44 Family caregivers of people with AD and other dementias report significant caregiving  
45  
46 strain concerning financial issues.[3] Caregiver stress related to the impaired person's  
47  
48 behavioral symptoms often leads to nursing home placement[13 14]. However, even  
49  
50 after caregivers place their family member in a nursing home, many still report high  
51  
52 levels of emotional and physical stress [15 16]. While three quarters of family caregivers  
53  
54  
55  
56  
57  
58  
59  
60

1  
2  
3 of people with AD and other dementias report no guilt in deciding to place their family  
4 member in a nursing home[3], this is less common among Hispanics[3 17].  
5  
6  
7  
8

### 9 10 **Dementia caregiving in Hispanics.**

11 The prevalence of dementia in Hispanics is higher than in Non-Hispanic Whites (NHW)  
12 nationally (27.9% vs 10.9% in persons aged 75 to 84 years; 62.9% vs. 30.2% in persons  
13 85 years and older) including New York City [18 19]. Moreover, Hispanics are the fastest  
14 growing ethnic group in the United States in general [20], and in the age groups of > 65  
15 and >85 years, the groups most at risk for cognitive impairment and dementia  
16 respectively. It is not surprising that the Alzheimer's Association has estimated that the  
17 ethnic group with the fastest growing prevalence of dementia is Hispanics[21]. This  
18 disparity does not seem to be explained by bias in diagnosis due to language or  
19 education but may be explained by a higher burden of risk factors for dementia in  
20 Hispanics compared to NHW, such as diabetes[18]. Consequently, the burden of  
21 dementia care is proportionally higher in Hispanics compared to Non-Hispanic Whites. In  
22 addition, Hispanics tend to delegate less of the care of their relatives with dementia to  
23 paid caregivers[17].  
24  
25  
26  
27  
28  
29  
30  
31  
32  
33  
34  
35  
36  
37  
38  
39

40 According to surveys conducted by the Alzheimer's Association, Hispanic  
41 caregivers are on average 43 years old, and younger than NHW, and African-American  
42 caregivers[3]. They are less likely to be married than NHW caregivers (48 % versus 63  
43 %) and more likely to have children or grandchildren under age 18 living in their  
44 household (47% versus 32% of all caregivers, 30% of NHW caregivers and 30% of  
45 African-American caregivers). Hispanic caregivers are more likely to be a primary  
46 caregiver (61 % contrasted with 48 % of NHW caregivers and 43 % of Asian-American  
47 caregivers) and more likely to report an annual income of under \$50,000 (56 % versus  
48 39 % of caregivers overall, 34 % of NWH caregivers and 31% of Asian-American  
49  
50  
51  
52  
53  
54  
55  
56  
57  
58  
59  
60

1  
2  
3 caregivers). They are more likely to report needing help balancing their work and family  
4 responsibilities (39% versus 27% of caregivers overall and 25% of NHW caregivers) and  
5 finding time for themselves (41% versus 29% of NHW caregivers)[3]. In summary, the  
6 caregiving experience tends to be accompanied by more stressors for Hispanics  
7 compared to NHW.  
8  
9  
10  
11  
12  
13

### 14 **The New York University Caregiver Intervention.**

15  
16 The NYU Caregiver Intervention (NYUCI) has substantial evidence of efficacy for spouse  
17 caregivers of persons with AD and related dementias [22-31]. The underlying theme of  
18 the NYUCI is that improving social support improves caregiver wellbeing, and thereby  
19 obviates or defers the need for nursing home placement (NHP) [22 23 25]. The NYUCI  
20 was evaluated in a longitudinal randomized controlled trial over more than two decades  
21 that included 406 spouse caregivers. The intervention alleviated the deleterious effects  
22 of caregiving on mental and physical health of spouse-caregivers [22-24], and  
23 postponed or prevented NHP of their AD patient spouses [25-26]. The NHP rate of  
24 people with dementia whose spouses received the NYUCI was 72% of the NHP rate in  
25 the usual care group, and the median difference between the two groups was 557 days  
26 [26]. Moreover, the intervention's effects on caregiver depression were long-lasting and  
27 continued through NHP and death of the person with AD [27-30]. Changes in caregiver  
28 reaction to the spouse's memory and behavioral problems, satisfaction with social  
29 support and depression collectively explained 61.2% of the intervention's effect on NHP  
30 of their spouses [26]. A mediation analysis demonstrated that a substantial proportion of  
31 effect on change in these outcomes could be attributed to intervention-induced increases  
32 in the caregivers' satisfaction with their social support networks [29]. The intervention  
33 increased both objective indicators of social support, and more subjective measures.  
34 The effects of change in satisfaction with social support were found to be significant  
35  
36  
37  
38  
39  
40  
41  
42  
43  
44  
45  
46  
47  
48  
49  
50  
51  
52  
53  
54  
55  
56  
57  
58  
59  
60

1  
2  
3 predictors of both change in stress appraisals ( $p < .0001$ ) and change in depression ( $p <$   
4  
5  
6  
7  
8  
9  
10  
11  
12  
13  
14  
15  
16  
17  
18  
19  
20  
21  
22  
23  
24  
25  
26  
27  
28  
29  
30  
31  
32  
33  
34  
35  
36  
37  
38  
39  
40  
41  
42  
43  
44  
45  
46  
47  
48  
49  
50  
51  
52  
53  
54  
55  
56  
57  
58  
59  
60

predictors of both change in stress appraisals ( $p < .0001$ ) and change in depression ( $p <$   
.0001) [29]. The NYUCI is listed and described in detail on the National Registry of  
Evidence-based Programs and Practices website [31]. This intervention is unique in its  
emphasis on family support and in providing continual availability of a counselor. While  
the NYUCI is being implemented in six states and in Israel, its effectiveness in the  
Hispanic community has not been tested. Thus we proposed to test its effectiveness in  
this population conducting a community based randomized trial called the Northern  
Manhattan Caregiver Intervention Project (NOCIP). We hypothesized that the NYUCI  
would be associated with greater reduction in depressive symptoms and burden  
compared to usual care after 6 months of the intervention.

**The Northern Manhattan Caregiver Intervention Project as a comparative effectiveness research project.**

NOCIP is a comparative effectiveness research (CER) project conducted under the  
auspices of the Northern Manhattan Center of Excellence in Comparative Effectiveness  
Research to Eliminate Disparities (NOCERED) funded by the National Institute of  
Minority Health and Health Disparities (NIMHD; 3P60MD000206-08S1) in the United  
States. Comparative effectiveness research[32] can be defined as the direct comparison  
of existing interventions with proven efficacy to determine which work best for whom and  
which pose the greatest benefits and harms. Efficacy is the effect of an intervention  
under ideal conditions. Effectiveness is the effect of an intervention with proven efficacy  
in real world settings. We chose to conduct a CER project in mental health of caregivers  
of persons with dementia because this is one of the priority areas for CER from the  
Institute of Medicine (interventions for caregivers of persons with dementia), and it also  
addresses 2 priority conditions for the Agency for Health Care Research and Quality  
(AHRQ): Dementia and Depression. We chose to test a counseling intervention in



1  
2  
3 Hispanic caregivers because Hispanics have a greater burden of dementia compared to  
4  
5 NHW, and because caregiving in Hispanics has particular characteristics, as explained  
6  
7 before. We chose to test the effectiveness of the NYUCI because this is one of the most  
8  
9 widely disseminated interventions for caregivers of persons with dementia. In addition,  
10  
11 the NYUCI focuses on families, which may be particularly pertinent to Hispanic  
12  
13 caregivers. NOCIP is an adaptation of the NYUCI to the realities of Hispanic caregivers  
14  
15 in New York City.

16  
17  
18 Pilot data for 29 Hispanic spouse caregivers of persons with dementia in Northern  
19  
20 Manhattan[17] showed that all participants reported decreased sense of burden and  
21  
22 depression and increased coping skills. However, community based case management  
23  
24 was deemed necessary in addition to the NYUCI in light of significant social and  
25  
26 economic barriers that led to the caregivers feeling overwhelmed- this observation was  
27  
28 used for justifying using the CHW intervention in this study as the control arm, and aiding  
29  
30 the NYUCI arm. This pilot study also reported that Hispanic caregivers in Northern  
31  
32 Manhattan perceive caring for aging and ailing family members as a *family affair*,  
33  
34 congruent with familism [33]. Thus, embracing a family-centered perspective in all levels  
35  
36 of assessment is key to effective communication and quality care for Hispanic  
37  
38 caregivers. A family approach is a particular characteristic of the NYUCI that we  
39  
40 hypothesized would be effective in the Hispanic community of New York City.

41  
42  
43 NOCIP is the first randomized trial testing the effectiveness of implementation of the  
44  
45 NYUCI in an Urban Hispanic Community, in relative caregivers including spouses and  
46  
47 non-spouses. NOCIP will provide important information about its potential benefits in this  
48  
49 community.  
50  
51

## 52 53 54 55 **METHODS AND ANALYSIS.**

56  
57 The Northern Manhattan Caregiver Intervention Project (NOCIP; [clinicaltrials.gov](http://clinicaltrials.gov)  
58  
59  
60

1  
2  
3 NCT01306695; PI: Luchsinger) is a randomized controlled trial (RCT) comparing an  
4 enhanced NYUCI intervention that includes a community health worker (CHW) case  
5 management component with a CHW case management intervention alone. The RCT is  
6  
7  
8  
9  
10 being conducted in a sample of 160 Hispanic family caregivers (80 per arm) of persons  
11  
12 with dementia residing in the community of Northern Manhattan. The follow-up period is  
13  
14 6 months. Our study is approved by the Institutional Review Board of Columbia  
15  
16 University Medical Center in New York City. Following consent, determination of  
17  
18 eligibility and completion of baseline measures, the coordinator alerts the Data  
19  
20 Coordinating Center (DCC) electronically either via encrypted email or data uploads to a  
21  
22 secure server. Respondents are randomized to treatment or active placebo groups. The  
23  
24 randomization algorithm accommodates rolling enrollment, and the results are checked  
25  
26 periodically for balance. All study personnel are fluent in English and Spanish. The  
27  
28 study coordinator screens participants and gives eligibility information to the DCC at the  
29  
30 Research Division of the Hebrew Home at Riverdale. The DCC provides the counselor  
31  
32 administering the NYUCI the identification numbers of participants randomized to the  
33  
34 intervention. The study coordinator and the CHWs are blind to this randomization  
35  
36 process. Each participant is randomized to one of the two study CHWs, in order to  
37  
38 maintain balance of CHWs in the two study arms.  
39  
40  
41  
42  
43

#### 44 **Participants.**

45  
46 All study participants are caring for a family member (spouse, parent, sibling or other  
47  
48 family member) with a clinical diagnosis of dementia. All people with dementia must be  
49  
50 living at home when the caregiver enrolls in the study.  
51

52  
53 The eligibility criteria for the study are the following:  
54

- 55 1) Ethnicity: Caregiver must be Hispanic.
- 56
- 57 2) Living arrangements: Respondent is the spouse or is otherwise related to the care
- 58
- 59
- 60

1  
2  
3 recipient and is a caregiver of the patient with dementia (although he/she does not  
4  
5 have to live with the recipient).  
6

- 7  
8 3) Care receiver must have a diagnosis of dementia.  
9  
10 4) Care receiver must not have had a stroke with hemiparesis or any other motor  
11  
12 impairment.  
13  
14 5) Care receiver is not confined to a wheelchair.  
15  
16 6) Care receiver does not suffer from Parkinson's disease.  
17  
18 7) Care receiver does not suffer from any other disorder that severely limits movement.  
19  
20 8) Caregiver does not have impaired speech.  
21  
22 9) Caregiver is physically able to provide care.  
23  
24 10) Caregiver does not have an exclusionary psychiatric diagnosis (depression with  
25  
26 psychosis). Caregivers with clinical depression or other serious mental illness will be  
27  
28 referred elsewhere for mental health treatment. 11) Respondent will be in the area for  
29  
30 next 7 months (vacation of less than 4 weeks is ok).  
31  
32 12) The person with dementia or the caregiver has to be in contact with at least one  
33  
34 relative or close friend living in the New York City metropolitan area.  
35  
36 13) Hearing is sufficient to allow for communication.  
37  
38  
39  
40  
41

42 Rationale for eligibility criteria of participants.

43  
44 NOCIP was originally planned for Hispanic spouse caregivers of persons with dementia,  
45  
46 as in the original efficacy trials of the NYUCI. However, we found early on in our  
47  
48 recruitment effort that most Hispanic caregivers in New York City were not spouses.  
49  
50 Some spouses were informal and included common-law partners, and divorced spouses  
51  
52 taking care of their ex-spouses. In addition, caregivers included adult children,  
53  
54 nephews/nieces, and siblings. Thus, following the CER principle of testing interventions  
55  
56 in the "real world", we modified our inclusion criteria to include any relative caregiver with  
57  
58  
59  
60

1  
2  
3 authorization from the funding agency. At the time of submission of this manuscript, out  
4  
5 of 93 caregivers enrolled in the trial, most were women (87.1%) and included 37  
6  
7 wives/partners (39.7%), 41 daughters (44.0%), 2 sisters (2.1%), and 1 niece (1%).  
8  
9 In addition to targeting all relative caregivers compared to only spouse caregivers, our  
10  
11 project has other important differences compared to the original studies of the NYUCI.  
12  
13 The original NYUCI targeted caregivers of spouses with AD. Our study targets  
14  
15 caregivers of persons with dementia of any type as long as the patient does not have a  
16  
17 significant motor deficit (e.g. hemiparesis from a stroke). This makes sense because it is  
18  
19 increasingly accepted that dementia is more heterogeneous than previously thought[34]  
20  
21 and that boundaries between dementia subtypes (e.g. AD vs. vascular dementia) are  
22  
23 arbitrary. The rationale for excluding persons with motor deficits is that these deficits  
24  
25 represent an additional burden not targeted by the NYUCI.  
26  
27  
28  
29  
30  
31  
32  
33  
34  
35

### 36 **Recruitment.**

37  
38 The sampling frame for recruitment is self-identified Hispanic caregivers of persons with  
39  
40 dementia in New York City. Our recruitment methods include:

- 41 - Promoting the study in the local memory disorders clinic;
- 42 - Promoting the study among physicians taking care of elderly persons in the  
43  
44 Ambulatory Care Network of New York Presbyterian Hospital;
- 45 - Participation in health fairs and community talks;
- 46 - Promotion at caregiver support groups and senior centers;
- 47 - Mailing postcards promoting the study with assistance of a marketing company  
48  
49 targeting households in Northern Manhattan with Hispanics aged 40 years and older;
- 50  
51  
52  
53  
54  
55  
56  
57  
58  
59  
60 and

- 1  
2  
3 - Mailing households on mailing lists of organizations of dementia caregivers in New  
4  
5 York City.  
6  
7  
8

9  
10 Consideration of recruitment strategies.

11  
12 We considered several recruitment strategies. The easiest way to recruit for this study  
13  
14 and our preferred approach would be to identify persons with dementia from  
15  
16 administrative datasets with inpatient and outpatient information including ICD-9 codes  
17  
18 for dementia and information on emergency contacts and next of kin. However, this  
19  
20 approach was not approved by the hospital center because of several concerns. First,  
21  
22 neither the person with dementia nor the caregiver had given consent to access their  
23  
24 administrative data for research purposes. Second, the persons with dementia would not  
25  
26 have the capacity to provide such consent and could not be consulted. Third, there  
27  
28 would be no assurance that the listed next of kin or other caregiver contacted was  
29  
30 actually aware of the diagnosis of dementia; this situation could cause harm if the  
31  
32 investigators contacted family members that were unaware of the diagnosis of dementia.  
33  
34 Thus, we have resorted to the strategies described in the methods section including  
35  
36 recruitment in the community (particularly senior centers and caregiver programs),  
37  
38 through outreach in medical services including general medicine, geriatric practices,  
39  
40 psychiatry practices, and memory disorders clinics, and through targeted talks to  
41  
42 caregivers groups.  
43  
44  
45  
46  
47  
48  
49  
50

### 51 **Summary of interventions.**

52  
53 Both the NYUCI and the CHW intervention are carried out by bilingual personnel. The  
54  
55 NYUCI is carried out by a counselor with a Masters in Social Work (MSW) degree who  
56  
57 has experience in dementia and caregiving issues. The CHW have at least a 2-year  
58  
59  
60

1  
2  
3 college degree (e.g. health education), and are trained at a community based  
4  
5 organization named Alianza Dominicana, Inc., following a curriculum for CHWs that has  
6  
7 been previously established. All study visits and those for the interventions are carried  
8  
9 out in the participants' homes or place of preference. In the case of the intervention arm,  
10  
11 in which participants receive both the CHW intervention and NYUCI, these interventions  
12  
13 are carried out independently. There is no communication between the NYUCI counselor  
14  
15 and the CHW, and their visits do not coincide. The NYUCI is an *active* counseling  
16  
17 intervention that targets specific issues related to caregiving for persons with dementia.  
18  
19 The CHW intervention targets general wellbeing and provides *passive* information about  
20  
21 resources for caregivers of persons with dementia.  
22  
23  
24  
25  
26

#### 27 Overview of the NYU Caregiver Intervention.

28  
29 The *first component* consists of two individual and four family counseling sessions that  
30  
31 include relatives suggested by the caregiver. The content of these sessions is  
32  
33 determined by the needs of each caregiver and other participating family members (e.g.,  
34  
35 learning techniques for management of troublesome patient behavior, and promoting  
36  
37 communication among family members). These sessions last between one and 1.5  
38  
39 hours. The *second component* of the intervention is participation in a support group to  
40  
41 provide the caregiver with continuous emotional support and education. The *third*  
42  
43 *component* of the treatment is “ad hoc” counseling—the continuous availability of  
44  
45 counselors to caregivers and families to help them deal with crises and with the  
46  
47 changing nature and severity of their relatives' symptoms over the course of the disease.  
48  
49 The emergence of new psychiatric and behavioral problems of patients, which are  
50  
51 generally more stressful than the need for assistance with activities of daily living or  
52  
53 physical limitations, often precipitate ad hoc calls from caregivers. Ad hoc counseling  
54  
55  
56  
57  
58  
59  
60

1  
2  
3 makes it possible for caregivers and families to determine the amount of contact they  
4  
5 have with the counselors beyond the scheduled structured sessions.  
6

7 The NYUCI is being administered by a bilingual (English, Spanish) counselor with a  
8  
9 MSW degree and has experience with dementia.  
10

11  
12  
13  
14 Overview of the community health worker (CHW) intervention.

15  
16 The CHW intervention consists of 2 visits in month 1, followed by monthly visits until  
17  
18 month 6. The main role of the CHW is to provide access to existing education and  
19  
20 referral resources about dementia and caregiving. In addition, the CHW assesses other  
21  
22 health and social issues and provides information on existing resources in New York  
23  
24 City. The CHW carries a smartphone with real time access to email, text, the internet,  
25  
26 and telephone. CHWs also provide participants with their telephone number and email  
27  
28 address for ad-hoc contacts.  
29  
30

31  
32 The CHWs are based at Alianza Dominicana. In summary, the CHWs provide existing  
33  
34 written information from the New York City chapter of the Alzheimer's Association,  
35  
36 medical resources related to dementia at local medical centers and the community of  
37  
38 Northern Manhattan, senior centers, and support groups. This information is given in the  
39  
40 first visit in a manual written for this study and reinforced in all subsequent visits and on  
41  
42 an ad-hoc basis.  
43

44  
45 During the 2<sup>nd</sup> through 4<sup>th</sup> home visit the CHW deals with barriers and goal setting. On  
46  
47 the basis of patient needs and preferences the CHW assists the caregivers in  
48  
49 developing an individualized plan towards maintaining their health and wellbeing. The  
50  
51 CHW orients the participant in the principles of self-management[35 36] and engages  
52  
53 the participant in a problem-solving process to: Set priorities for immediate problem  
54  
55 resolution; set personal goals; develop a plan to accomplish those goals, and review  
56  
57  
58  
59  
60

1  
2  
3 results and revise the plan as needed. While the focus of the research intervention is  
4 on dementia education, the CHWs address these issues from an overall health and  
5 general well being approach. This is consistent with the CHW model that takes a patient  
6 centered approach and not a narrow disease specific focus.  
7  
8  
9  
10

11  
12 On the basis of the home assessment, CHW help with referrals to community  
13 based resources that may be social or medically based, for example accessing housing,  
14 public assistance, health insurance, immigration related issues, day care (for children or  
15 elderly parents), services for domestic violence, etc., with the goal of eliminating  
16 immediate needs so the individual could make her/his health a priority. A strength of  
17 the community based CHW model of service delivery is that through their training and  
18 exposure, CHWs are well aware of the existing programs in the community and are able  
19 to play an active role in addressing these issues by serving as a point of contact for  
20 community based resources.  
21  
22  
23  
24  
25  
26  
27  
28  
29  
30  
31  
32  
33  
34  
35  
36  
37

### 38 **Outcome variables.**

39  
40 For the purpose of this translation of the NYUCI, the primary outcomes are depressive  
41 symptoms, measured with the Geriatric Depression Scale (GDS) [37] and burden,  
42 measured with the Zarit caregiver burden scale (ZCBS) [38]. Secondary outcomes  
43 include caregiver health, measured with the caregiver physical health form[39] Revised  
44 Memory and Problem Behavior Checklist[40], the Stokes Social Network scale[41] and  
45 an assessment of the severity of patient dementia with the Global Deterioration  
46 Scale[42]. Additionally, several Patient Reported Outcomes Measurement and  
47 Information System (PROMIS) (NIHPROMIS.org) measures are included measuring the  
48 domains of physical functioning, depression and fatigue These outcomes variables are  
49  
50  
51  
52  
53  
54  
55  
56  
57  
58  
59  
60



1  
2  
3 collected at baseline and 6 month visits by a bilingual study coordinator who is blind to  
4  
5 group assignment.  
6  
7

#### 8 9 Rationale for Outcome Variables.

10  
11 We considered several measures of depression and stress as our primary  
12  
13 outcomes. The selection of the GDS as the primary measure of depression was based  
14  
15 on the use of this measure in the original study of the NYUCI, and findings from the  
16  
17 literature related to differential item functioning (DIF) in measures of depression.  
18  
19 Although there are few studies of DIF among Latino samples, our review[43]of DIF in  
20  
21 depression measures showed that many Center for Epidemiologic Studies Depression  
22  
23 Scale (CES-D) items were biased for ethnically diverse groups. Thus, we are using the  
24  
25 GDS, which although also containing items with DIF, have fewer such items, and less  
26  
27 with somatic content. The latter have been found to be problematic with older  
28  
29 individuals with comorbidities[44]; such individuals will likely comprise a large part of the  
30  
31 caregiver sample. Additionally, we are using the short-form depression measure from  
32  
33 the National Institutes of Health Patient Reported Outcomes Measurement Information  
34  
35 System (PROMIS) item bank[45 46] as a secondary outcome. This measure has been  
36  
37 found to be relatively DIF-free in the limited studies conducted. It has not been tested  
38  
39 for DIF among Latino elderly, nonetheless, because of its primacy in future studies of  
40  
41 depression, we will include it as an exploratory endpoint measure. The Zarit Caregiver  
42  
43 burden scale (ZCBS) was chosen because it has been shown to be a good measure of  
44  
45 dementia caregiver burden and caregiver collapse[47]. The ZCBS has been shown to  
46  
47 improve in Hispanic communities in South Florida with the Resources for Enhancing  
48  
49 Alzheimer's Caregiver Health (REACH), another intervention for dementia caregivers[48-  
50  
51 50], and has also been used in studies of the NYUCI[22]. Since an objective of the  
52  
53  
54  
55  
56  
57  
58  
59  
60

1  
2  
3 NYUCI and our CHW intervention is to alleviate caregiver burden we chose to include a  
4  
5 measure of caregiver burden previously used in Hispanics as a co-primary outcome.  
6  
7

### 8 9 10 **Statistical plan and data analysis.**

#### 11 12 Sample Size and Power Analysis

13  
14 *Assumptions:* The sample size calculations are based on the number of subjects needed  
15  
16 to provide adequate power to test the primary hypothesis related to group differences in  
17  
18 depression and burden at six-month follow-up. The primary power calculations assume  
19  
20 separate analyses of burden and depression measures; however, the use of MANOVA  
21  
22 to perform a simultaneous test was also considered because it is generally more  
23  
24 powerful, and makes use of more information. In addition, although full information  
25  
26 likelihood estimation procedures will be used for the primary analyses, thereby allowing  
27  
28 us to include participants who do not complete the follow-up assessment (on an intent-  
29  
30 to-treat basis), the power calculations include scenarios in which there is loss to follow-  
31  
32 up as large as 20%. Based on the trial data extant, heterogeneous variances are not  
33  
34 expected; however, this possibility was considered.  
35  
36  
37

38  
39 *Effect sizes (Cohen's  $d$ [51]) for depression and burden:* Studies of caregivers  
40  
41 have used different depression measures; for example, the Resources for Enhancing  
42  
43 Alzheimer's Caregiver Health (REACH) study[48] used the Center for Epidemiologic  
44  
45 Studies Depression Scale (CES-D)[52], whereas the New York University Caregiver  
46  
47 Intervention (NYUCI) study used the GDS [37]. Both studies used the Zarit Burden  
48  
49 Interview (ZBI)[38]. For the ZBI, we used the estimates from REACH because they  
50  
51 included a sample of Hispanic caregivers; for the depression measure we used  
52  
53 estimates from the GDS provided from the NYUCI study. Based on these studies, the  
54  
55 following data were used for estimation: the baseline ZBI standard deviations in the NYU  
56  
57  
58  
59  
60

study were 9.46 and 10.86 in the treatment and enhanced care groups, respectively. In the Hispanic REACH sample, the estimates of the parameters are as follows:  $\mu_{T1}$  (Treatment group mean and (standard deviation))= 16.9 (9.6);  $\mu_{T2}$ (6 month follow-up) =14.9 (9.1)  $\mu_{C1}$  (Control group) = 17.4 (9.9);  $\mu_{C2}$  =15.9 (9.9). The estimate used for  $\alpha$  (reliability) was 0.85 and for  $\rho$  (correlation between time 1 and time 2) between 0.50 and 0.70. The estimate used for  $\sigma$  (pooled standard deviation) was  $\approx$  9.8. Because the standard deviation for both the ZBI and the GDS in these studies was almost the same, we focused our power calculations on ZBI, realizing that most apply equally to the GDS. A SAS macro was used for power calculations.

#### *Power for endpoint analyses.*

Although the primary analyses proposed a full information mixed model approach, to be conservative, the power calculations were also examined based on a two-group comparison of endpoint means (differences in means), with possible attrition. It was assumed that because of randomization that there would be no need for baseline adjustment. The following assumptions were made:  $\sigma$  =9.8,  $\alpha$  =0.05,  $R$  =0.85 (reliability),  $g$  = 2 (groups). Assuming power of 0.80, with 80 per group (160 total) we would be able to detect a moderate effect size (Cohen's  $d=0.48$ ) -- equivalent to about 4.71 points on the ZBI or GDS – about a 5 point endpoint mean difference between groups. Sample size requirements were also examined for the detection of other endpoint differences: 4.0, 4.5 points and 5 points. Sample sizes to detect this range of effects are: 111, 88 and 71, respectively. Also examined were different scenarios regarding correlations between baseline and six-month follow-up outcome measures. The following formula from Fleiss (p 4-5)[53] was modified to include different scenarios related to correlations between the two waves of data:

$$n^* = \frac{4(1 - \rho)(\sigma_T^2 + \sigma_e^2)(z_{\alpha/2} + z_\beta)^2}{\delta^2}, \text{ adjusting for unreliability: } n = \frac{n^*}{R}.$$

Assuming a sample size of 80 per group, and  $\rho$  (correlations between waves of data) =0.5, 0.6 and 0.7, the resulting estimates of effect sizes are  $\delta=4.71, 4.21,$  and 3.65, thus demonstrating that a medium effect size (Cohen's  $d=0.37$  to 0.48) could be detected with this sample size.

*Power for longitudinal multivariate analyses.*

Assuming that the outcomes are correlated, power for MANCOVA was performed, taking into account possible baseline differences (using the observed means from the Hispanic REACH study) and adjusting for unreliability. We also modeled different correlations between the first and second waves of data.

$$R_{xy}^2 = \frac{d^2}{d^2 + 1/p(1-p)} \quad \text{Where } d = \frac{\delta}{\sigma} \text{ and } p \text{ is proportion of the combined populations}$$

in either of the populations ( $p=0.5$  for equal size in the intervention and control groups)

$$\text{(Cohen, pg 490-493), and } f^2 = \frac{R_{xy}^2}{1 - R_{xy}^2} \text{ and } f_1^2 = f^2 * R_{\text{reliability}} * 2(1 - \rho) \text{ (adjusted for}$$

unreliability and  $\rho$ ). The non-centrality parameter ( $\lambda$ ) is  $\lambda = f_1^2(u + v + 1)$  where  $u=k_y$

(outcomes in Manova), and  $v=N - k_y - 1$  ( $N$ =total sample size). The effect sizes were

obtained in an iterative procedure, based on the assumptions shown in Table 1.

Power for MANOVA was also examined under several scenarios regarding the non-centrality parameter. The resulting  $\lambda$ 's are shown in Table 2. The following assumptions were made:  $\alpha = 0.05$ ,  $\sigma = 9.8$ ; reliability=0.85.  $\delta=5$  point reduction in the intervention relative to the control group.

*Power for comparing rates of change over time in response between groups.*

Power to detect a difference in slopes ( $\beta_{1A} - \beta_{1B}$ ) over the six months of the study was

examined. The following formula provides an estimate of the required sample sizes[54

55]:  $m = [\sigma^2(1-\rho)2(Z_{\alpha/2} + Z_{\beta})^2] / ns_x^2 d^2$ , where  $x_i$  is time, measured as the duration

1  
2  
3 between the first and  $j$ th occasion,  $j=0,1$ . The same assumptions as above were made.  
4  
5 A smaller  $n$  (about 56 per group) was required. Although power is greater for evaluation  
6  
7 of slopes over endpoint means, it is not recommended that sample sizes be less than  
8  
9 80, given that the power calculations in the REACH project also yielded requirements in  
10  
11 the range of 80 to 100 per group.  
12  
13

14 In summary, across the methods (see Table 3) Cohen's  $d$  ranged from 0.37 to  
15  
16 0.54 or between 4 and 5 points on the ZBI or GDS endpoint means -- roughly equivalent  
17  
18 to a 0.5 SD endpoint difference in means -- or a moderate effect size. Conservatively,  
19  
20 under the assumptions specified above, 80 subjects per group will provide power  $\geq 0.80$   
21  
22 to detect a 4 to 5 unit differential change in depression and burden, based on testing the  
23  
24 Time X Group interaction, allowing for heterogeneous variances and serial correlations  
25  
26 (Figure 1). Even if the pooled variance is higher than assumed, medium effect sizes are  
27  
28 still detectable. Thus, **80** subjects per arm will provide sufficient power to detect the  
29  
30 hypothesized difference between the active control and the intervention arm of the study.  
31  
32  
33  
34  
35

### 36 Analytic Plan

37  
38 Our approach to the analyses is guided by our own experience[56] , and recent  
39  
40 reviews of the relative advantages of constrained full information likelihood treatment of  
41  
42 the outcome vs. inclusion of the baseline value as a covariate in ANCOVA[57], and  
43  
44 methods of estimation (Generalized Estimating Equations (GEE) vs mixed random  
45  
46 effects)[58]. The primary proposed analyses will use mixed random effects models, and  
47  
48 a FIML approach, with sensitivity analyses using GEE. The change from pre- to post-  
49  
50 treatment values of continuous outcomes will be modeled as functions of baseline  
51  
52 values, treatment and the interaction of baseline and treatment. Such an approach  
53  
54 allows for possible group heterogeneity in residual variances and serial correlations that  
55  
56  
57  
58  
59  
60

1  
2  
3 may require modeling. Based on prior analytic experience with the outcome variables, it  
4  
5 is not expected that transformations will be necessary.  
6

7  
8 Prior to analyses, baseline values of all variables from each arm will be  
9  
10 examined; however, no p values will be provided, and covariates are not proposed for  
11  
12 inclusion in the main analyses of treatment effects. Depending on the severity of missing  
13  
14 data, other modeling techniques may be used. Examination of baseline differences on  
15  
16 key variables between completers and those lost-to-follow-up will be conducted to inform  
17  
18 about the nature of the missing data. The intent-to-treat analyses performed using SAS  
19  
20 PROC MIXED will permit all individuals with at least one observation to be included.  
21  
22 Other methods of examining missing data (e.g., propensity scores and multiple  
23  
24 imputation) will be considered in sensitivity analyses.  
25  
26

27  
28 Depending on the observed correlation between the dependent variables,  
29  
30 MANOVA or MANCOVA will be performed in sensitivity analyses. A significant  
31  
32 interaction term for one of the groups would indicate that the effect of one of the  
33  
34 treatments is different for ZBI and GDS; in that case two treatment effects will be  
35  
36 estimated for each outcome. If the interaction is not significant a model with only main  
37  
38 effects for the outcomes and treatment will be fit and the treatment effect (common for  
39  
40 ZBI and GDS will be estimated from this model. In addition to significance testing, we will  
41  
42 estimate the treatment effects with 95% CI. The general hypothesis is that, controlling for  
43  
44 covariates (if needed), the vector of means will differ over time between groups. Or we  
45  
46 can adjust each vector of means for prescore level, and test the hypothesis of equality of  
47  
48 means for the groups using Wilks' lambda or Hotelling's  $T^2$ . More powerful methods  
49  
50 such as a risk score test [59] may be used, depending upon whether all endpoints are  
51  
52 affected equally or not. Bartlett's test of sphericity will inform about the degree of  
53  
54 intercorrelation among the outcome measures in order to determine suitability of the  
55  
56  
57  
58  
59  
60

1  
2  
3 basic MANOVA model. Using collinearity diagnostics and examination of correlations,  
4  
5 the final covariate set will be selected. It is anticipated that there will be:  $k_y = 2$  non-  
6  
7 redundant outcomes (depression and burden)  $k_c = 1$  exogenous baseline covariate  $k_x =$   
8  
9 1 dummy variable (NYU intervention). Depending on the results of the analyses of bias  
10  
11 due to attrition or selection, other covariates may be included.  
12  
13

14  
15 Possible attrition bias will be addressed using information from the baseline  
16  
17 assessment. Completers and dropouts will be compared with respect to  
18  
19 sociodemographics, baseline ZBI and GDS, and other covariates. A logit model of  
20  
21 attrition will be developed. If attrition is significantly related to one or more baseline  
22  
23 characteristics, the predicted values from this model can be used as a covariate to  
24  
25 adjust for differential attrition. Depending on the degree of bias, another approach is to  
26  
27 perform propensity score analyses, in which the treatment groups are combined, and a  
28  
29 logistic regression predicting original group membership from covariates performed. The  
30  
31 resulting probabilities are then arrayed in quintiles, and the subjects within each quintile  
32  
33 randomly assigned to new groups. The analyses will be re-run with the new group  
34  
35 designations in order to determine if the effects were similar in the new analyses with  
36  
37 groups equalized.  
38  
39

40  
41 Under the assumption that the missing data are either Missing Completely at  
42  
43 Random (MCAR) or Missing at Random (MAR), we will use the above-described  
44  
45 maximum-likelihood approach to estimate treatment effects including the baseline data  
46  
47 for these subjects in the analysis, in conjunction with the covariate to adjust for attrition  
48  
49 bias (if necessary). Scales will be prorated for missing data, using individual imputation  
50  
51 algorithms developed by the measurement statisticians at the DCC. Missing data are  
52  
53 only replaced for those who are missing less than 50% of items.  
54  
55  
56  
57  
58  
59  
60



1  
2  
3 Because the analysis is based on intent-to-treat (ITT), an attempt will be made to  
4 obtain post-treatment data from all participants randomized, regardless of level of  
5 attendance, thus minimizing loss to 6-month follow-up. Because most programs do not  
6 retain all participants nor do all receive the same “dose” of the intervention, inclusion of  
7 participants who received only part of their targeted program is more reflective of the  
8 real-world impact. Secondary analyses will be conducted to investigate the impact of  
9 differential participation, stratifying the participants in the treatment conditions based on  
10 their degree of participation and examining differences between strata on the outcome  
11 measures at follow-up. However, it is acknowledged that the sample sizes are small for  
12 such analyses.  
13  
14  
15  
16  
17  
18  
19  
20  
21  
22  
23

#### 24 25 26 27 **ETHICS AND DISSEMINATION.**

28 This study is approved by the Institutional Review Board of Columbia University Medical  
29 Center (AAAI0022). The study is monitored by a 3 member Data Safety and Monitoring  
30 Board (DSMB) that is convened twice a year. The DSMB is comprised of an expert in  
31 clinical trials of behavioral interventions, a neurologist with expertise in dementia and  
32 mental health, and a social worker with expertise in counseling interventions for persons  
33 with dementia. The DSMB is provided with up-to-date recruitment and adverse events  
34 data. The results of the study will be submitted for publication in a peer review journal. In  
35 addition, we will submit manuscripts on the characteristics of Hispanics in New York City  
36 once recruitment is completed. The funding agency will have no role in the content of  
37 these manuscripts.  
38  
39  
40  
41  
42  
43  
44  
45  
46  
47  
48  
49  
50

#### 51 52 53 **REGISTRATION**

54 This project is registered in the United States in the clinicaltrials.gov website  
55 (NCT01306695).  
56  
57  
58  
59  
60



**REFERENCES**

1. *Diagnostic and Statistical Manual of Mental Disorders, (DSM-IV)*. Washington, D.C.: American Psychiatric association, 1994.
2. Cummings JL. Alzheimer's Disease. *N Engl J Med* 2004;**351**(1):56-67
3. Thies W, Bleiler L. 2011 Alzheimer's disease facts and figures. *Alzheimers Dement* 2011;**7**(2):208-44 doi: S1552-5260(11)00036-7 [pii] 10.1016/j.jalz.2011.02.004[published Online First: Epub Date]|.
4. Hachinski V, Iadecola C, Petersen RC, et al. National Institute of Neurological Disorders and Stroke-Canadian Stroke Network vascular cognitive impairment harmonization standards. *Stroke* 2006;**37**(9):2220-41
5. Seshadri S, Wolf PA, Beiser A, et al. Lifetime risk of dementia and Alzheimer's disease. The impact of mortality on risk estimates in the Framingham Study. *Neurology* 1997;**49**(6):1498-504.
6. Evans DA, Funkenstein HH, Albert MS, et al. Prevalence of Alzheimer's disease in a community population of older persons. Higher than previously reported. *Jama* 1989;**262**(18):2551-6.
7. NIH Consensus Development Conference Statement on Preventing Alzheimer's Disease and Cognitive Decline. NIH Consensus and State-of-the-Art Statements 2010;**27**(4)
8. Lyketsos CG, Steele C, Baker L, et al. Major and minor depression in Alzheimer's disease: prevalence and impact. *J Neuropsychiatry Clin Neurosci* 1997;**9**:556-61

- 1  
2  
3  
4 9. Lyketsos CG, Sheppard JM, Steinberg M, et al. Neuropsychiatric disturbance in  
5  
6 Alzheimer's disease clusters into three groups: the Cache County study.  
7  
8 2001:1043-53  
9
- 10  
11 10. Lyketsos CG, Lopez O, Jones B, et al. Prevalence of neuropsychiatric symptoms in  
12  
13 dementia and mild cognitive impairment: results from the cardiovascular  
14  
15 health study. JAMA 2002;**288**(12):1475-83 doi: joc20689 [pii][published  
16  
17 Online First: Epub Date]].  
18  
19
- 20  
21 11. Monin JK, Schulz R. Interpersonal effects of suffering in older adult caregiving  
22  
23 relationships. Psychol Aging 2009;**24**(3):681-95 doi: 2009-13203-017 [pii]  
24  
25 10.1037/a0016355[published Online First: Epub Date]].  
26  
27
- 28  
29 12. Yaffe K, Fox P, Newcomer R, et al. Patient and caregiver characteristics and  
30  
31 nursing home placement in patients with dementia. JAMA  
32  
33 2002;**287**(16):2090-7 doi: joc11467 [pii][published Online First: Epub  
34  
35 Date]].  
36  
37
- 38  
39 13. Taylor DH, Jr., Ezell M, Kuchibhatla M, et al. Identifying trajectories of depressive  
40  
41 symptoms for women caring for their husbands with dementia. J Am Geriatr  
42  
43 Soc 2008;**56**(2):322-7 doi: JGS1558 [pii]  
44  
45 10.1111/j.1532-5415.2007.01558.x[published Online First: Epub Date]].  
46  
47
- 48  
49 14. Covinsky KE, Newcomer R, Fox P, et al. Patient and caregiver characteristics  
50  
51 associated with depression in caregivers of patients with dementia. J Gen  
52  
53 Intern Med 2003;**18**(12):1006-14 doi: 30103 [pii][published Online First:  
54  
55 Epub Date]].  
56  
57  
58  
59  
60

- 1  
2  
3  
4  
5  
6  
7  
8  
9  
10  
11  
12  
13  
14  
15  
16  
17  
18  
19  
20  
21  
22  
23  
24  
25  
26  
27  
28  
29  
30  
31  
32  
33  
34  
35  
36  
37  
38  
39  
40  
41  
42  
43  
44  
45  
46  
47  
48  
49  
50  
51  
52  
53  
54  
55  
56  
57  
58  
59  
60
15. Port CL, Zimmerman S, Williams CS, et al. Families filling the gap: comparing family involvement for assisted living and nursing home residents with dementia. *Gerontologist* 2005;**45 Spec No 1**(1):87-95 doi: 45/suppl\_1/87 [pii][published Online First: Epub Date]].
16. Schulz R, Belle SH, Czaja SJ, et al. Long-term care placement of dementia patients and caregiver health and well-being. *JAMA* 2004;**292**(8):961-7 doi: 10.1001/jama.292.8.961 292/8/961 [pii][published Online First: Epub Date]].
17. Rosenthal-Gelman C. Learning from recruitment challenges: Barriers to diagnosis, treatment, and research participation for Latinos with symptoms of Alzheimer's disease. *J Gerontol Soc Work* 2010;**53**:94-113
18. Noble JM, Manly JJ, Schupf N, et al. Type 2 Diabetes and Ethnic Disparities in Cognitive Impairment. *Ethn Dis* 2012;**22**:83-44
19. Tang MX, Stern Y, Marder K, et al. The APOE-epsilon4 allele and the risk of Alzheimer disease among African Americans, whites, and Hispanics. *Journal of the American Medical Association* 1998;**279**(10):751-5.
20. Humes KR, Jones NA, Ramirez RR. Overview of Race and Hispanic Origin: 2010. In: Bureau UC, ed. 2010 Census Briefs. Washington, DC: U.S. Department of Commerce, 2011.
21. 2011 Alzheimer's disease facts and figures. *Alzheimers Dement* 2011;**7**(2):208-44 doi: S1552-5260(11)00036-7 [pii] 10.1016/j.jalz.2011.02.004[published Online First: Epub Date]].

- 1  
2  
3 22. Gaugler JE, Mittelman MS, Hepburn K, et al. Predictors of change in caregiver  
4  
5 burden and depressive symptoms following nursing home admission.  
6  
7 Psychol Aging 2009;**24**(2):385-96 doi: 2009-08094-011 [pii]  
8  
9 10.1037/a0016052[published Online First: Epub Date]].  
10  
11  
12 23. Gaugler JE, Roth DL, Haley WE, et al. Can counseling and support reduce burden  
13  
14 and depressive symptoms in caregivers of people with Alzheimer's disease  
15  
16 during the transition to institutionalization? Results from the New York  
17  
18 University caregiver intervention study. J Am Geriatr Soc 2008;**56**(3):421-8  
19  
20 doi: JGS1593 [pii]  
21  
22 10.1111/j.1532-5415.2007.01593.x[published Online First: Epub Date]].  
23  
24  
25 24. Mittelman MS, Brodaty H, Wallen AS, et al. A three-country randomized  
26  
27 controlled trial of a psychosocial intervention for caregivers combined with  
28  
29 pharmacological treatment for patients with Alzheimer disease: effects on  
30  
31 caregiver depression. Am J Geriatr Psychiatry 2008;**16**(11):893-904 doi:  
32  
33 16/11/893 [pii]  
34  
35 10.1097/JGP.0b013e3181898095[published Online First: Epub Date]].  
36  
37  
38 25. Mittelman MS, Roth DL, Clay OJ, et al. Preserving health of Alzheimer caregivers:  
39  
40 impact of a spouse caregiver intervention. Am J Geriatr Psychiatry  
41  
42 2007;**15**(9):780-9 doi: 15/9/780 [pii]  
43  
44 10.1097/JGP.0b013e31805d858a[published Online First: Epub Date]].  
45  
46  
47 26. Drentea P, Clay OJ, Roth DL, et al. Predictors of improvement in social support:  
48  
49 Five-year effects of a structured intervention for caregivers of spouses with  
50  
51  
52  
53  
54  
55  
56  
57  
58  
59  
60

- 1  
2  
3 Alzheimer's disease. Soc Sci Med 2006;**63**(4):957-67 doi: S0277-  
4  
5 9536(06)00111-0 [pii]  
6  
7  
8 10.1016/j.socscimed.2006.02.020[published Online First: Epub Date]].  
9  
10  
11 27. Mittelman MS, Haley WE, Clay OJ, et al. Improving caregiver well-being delays  
12  
13 nursing home placement of patients with Alzheimer disease. Neurology  
14  
15 2006;**67**(9):1592-9 doi: 67/9/1592 [pii]  
16  
17  
18 10.1212/01.wnl.0000242727.81172.91[published Online First: Epub Date]].  
19  
20  
21 28. Roth DL, Mittelman MS, Clay OJ, et al. Changes in social support as mediators of  
22  
23 the impact of a psychosocial intervention for spouse caregivers of persons  
24  
25 with Alzheimer's disease. Psychol Aging 2005;**20**(4):634-44 doi: 2006-  
26  
27 00628-010 [pii]  
28  
29  
30 10.1037/0882-7974.20.4.634[published Online First: Epub Date]].  
31  
32  
33 29. Mittelman MS, Roth DL, Haley WE, et al. Effects of a caregiver intervention on  
34  
35 negative caregiver appraisals of behavior problems in patients with  
36  
37 Alzheimer's disease: results of a randomized trial. J Gerontol B Psychol Sci  
38  
39 Soc Sci 2004;**59**(1):P27-34  
40  
41  
42 30. Mittelman MS, Roth DL, Coon DW, et al. Sustained benefit of supportive  
43  
44 intervention for depressive symptoms in caregivers of patients with  
45  
46 Alzheimer's disease. Am J Psychiatry 2004;**161**(5):850-6  
47  
48  
49 31. Mittelman MS, Epstein C, Pierzchala A. *Counseling the Alzheimer's caregiver: A*  
50  
51 *resource for health care professionals*. Chicago: : Chicago: AMA Press., 2003.  
52  
53  
54  
55  
56  
57  
58  
59  
60

- 1  
2  
3  
4 32. Sox HC, Greenfield S. Comparative effectiveness research: a report from the  
5  
6 Institute of Medicine. *Ann Intern Med* 2009;**151**(3):203-5 doi: 0000605-  
7  
8 200908040-00125 [pii][published Online First: Epub Date]].  
9
- 10  
11 33. Neary SR, Mahoney DF. Dementia caregiving: the experiences of Hispanic/Latino  
12  
13 caregivers. *J Transcult Nurs* 2005;**16**(2):163-70 doi: 16/2/163 [pii]  
14  
15 10.1177/1043659604273547[published Online First: Epub Date]].  
16  
17
- 18 34. Savva GM, Wharton SB, Ince PG, et al. Age, neuropathology, and dementia. *N Engl*  
19  
20 *J Med* 2009;**360**(22):2302-9 doi: 360/22/2302 [pii]  
21  
22 10.1056/NEJMoa0806142[published Online First: Epub Date]].  
23  
24
- 25 35. Gonzales V, Hernandez-Marin M, Lorig K, et al. *Tormando control de su salud:*  
26  
27 *Una guia para el manejo de las enfermedades del corazon, diabetes, asma,*  
28  
29 *bronquitis, enfisema y otros problemas cronicos.* Boulder CO: Bull Publishing  
30  
31 Company, 2002.  
32  
33
- 34  
35 36. Lorig KR, Sobel DS, Stewart AL, et al. Evidence suggesting that a chronic disease  
36  
37 self-management program can improve health status while reducing  
38  
39 hospitalization: a randomized trial. *Med Care* 1999;**37**(1):5-14  
40  
41
- 42 37. Yesavage JA, Brink TL, Rose TL, et al. Development and validation of a geriatric  
43  
44 depression screening scale: a preliminary report. *J Psychiatr Res*  
45  
46 1982;**17**(1):37-49  
47  
48
- 49 38. Zarit SH, Reever KE, Bach-Peterson J. Relatives of the impaired elderly:  
50  
51 correlates of feelings of burden. *Gerontologist* 1980;**20**(6):649-55  
52  
53  
54  
55  
56  
57  
58  
59  
60

- 1  
2  
3  
4 39. Fitzgerald JF, Smith DM, Martin DK, et al. Replication of the Multidimensionality  
5  
6 of Activities of Daily Living. *Journal of Gerontology* 1993;**48**(1):S28-S32 doi:  
7  
8 10.1093/geronj/48.1.S28[published Online First: Epub Date]].  
9
- 10  
11 40. Teri L, Truax P, Logsdon R, et al. Assessment of behavioral problems in  
12  
13 dementia: the revised memory and behavior problems checklist. *Psychol*  
14  
15 *Aging* 1992;**7**(4):622-31  
16
- 17  
18 41. Stokes JP. Toward an understanding of cohesion in personal change groups. *Int J*  
19  
20 *Group Psychother* 1983;**33**(4):449-67  
21
- 22  
23 42. Reisberg B, Ferris SH, de Leon MJ, et al. The Global Deterioration Scale for  
24  
25 assessment of primary degenerative dementia. *Am J Psychiatry*  
26  
27 1982;**139**(9):1136-9  
28
- 29  
30 43. Teresi JA, Ramirez M, Lai JS, et al. Occurrences and sources of Differential Item  
31  
32 Functioning (DIF) in patient-reported outcome measures: Description of DIF  
33  
34 methods, and review of measures of depression, quality of life and general  
35  
36 health. *Psychol Sci Q* 2008;**50**(4):538  
37
- 38  
39 44. Grayson DA, Mackinnon A, Jorm AF, et al. Item bias in the Center for  
40  
41 Epidemiologic Studies Depression Scale: effects of physical disorders and  
42  
43 disability in an elderly community sample. *J Gerontol B Psychol Sci Soc Sci*  
44  
45 2000;**55**(5):P273-82  
46
- 47  
48  
49 45. Reeve BB. Special issues for building computerized-adaptive tests for measuring  
50  
51 patient-reported outcomes: the National Institute of Health's investment in  
52  
53 new technology. *Med Care* 2006;**44**(11 Suppl 3):S198-204 doi:  
54  
55 10.1097/01.mlr.0000245146.77104.50  
56  
57  
58  
59  
60

1  
2  
3 00005650-200611001-00026 [pii][published Online First: Epub Date]].  
4

5  
6 46. Reeve BB, Hays RD, Bjorner JB, et al. Psychometric evaluation and calibration of  
7  
8 health-related quality of life item banks: plans for the Patient-Reported  
9  
10 Outcomes Measurement Information System (PROMIS). *Med Care* 2007;**45**(5  
11  
12 Suppl 1):S22-31 doi: 10.1097/01.mlr.0000250483.85507.04  
13

14  
15 00005650-200705001-00004 [pii][published Online First: Epub Date]].  
16

17  
18 47. Gort AM, Mingot M, Gomez X, et al. Use of the Zarit scale for assessing caregiver  
19  
20 burden and collapse in caregiving at home in dementias. *Int J Geriatr*  
21  
22 *Psychiatry* 2007;**22**(10):957-62 doi: 10.1002/gps.1770[published Online  
23  
24 First: Epub Date]].  
25

26  
27  
28 48. Belle SH, Burgio L, Burns R, et al. Enhancing the Quality of Life of Dementia  
29  
30 Caregivers from Different Ethnic or Racial Groups: A Randomized, Controlled  
31  
32 Trial. *Ann Intern Med* 2006;**145**(10):727-38  
33

34  
35 49. Wisniewski SR, Belle SH, Coon DW, et al. The Resources for Enhancing  
36  
37 Alzheimer's Caregiver Health (REACH): project design and baseline  
38  
39 characteristics. *Psychol Aging* 2003;**18**(3):375-84 doi: 10.1037/0882-  
40  
41 7974.18.3.375  
42

43  
44 2003-07824-003 [pii][published Online First: Epub Date]].  
45

46  
47 50. Amanda FE, Louis DB, Jamie D. Enhancing Caregiver Health: Findings from the  
48  
49 Resources for Enhancing Alzheimer's Caregiver Health II Intervention.  
50  
51 *Journal of the American Geriatrics Society* 2010;**58**(1):30-37  
52

53  
54 51. Cohen J. *Statistical Power Analysis for the Behavioral Sciences*. New York:  
55  
56 Academic Press  
57  
58  
59  
60



1  
2  
3 , 1977, 1988.  
4

5  
6 52. Radloff L. The CES-D scale: A self report depression scale for research in the  
7  
8 general population. *Applied Psychological Measurement*, 1977:385-401.  
9

10  
11 53. Fleiss JL. *Design and Analysis of Clinical Experiments*. New York: : John Wiley and  
12  
13 Sons., 1986, 1999.  
14

15  
16 54. Liu G, Liang K-Y. Sample size calculations for studies with correlated  
17  
18 observations. *Biometrics* 1997;**53**:937-47  
19

20  
21 55. Diggle, J. P, Heagerty P, Liang KY, Zeger SL. *Analysis of longitudinal data*. New  
22  
23 York: Oxford University Press, 2002.  
24

25  
26 56. Petkova E, Teresi J. Some statistical issues in the analyses of data from  
27  
28 longitudinal studies of elderly chronic care populations. *Psychosom Med*  
29  
30 2002;**64**(3):531-47  
31

32  
33 57. Liu GF, Lu K, Mogg R, et al. Should baseline be a covariate or dependent variable  
34  
35 in analyses of change from baseline in clinical trials? *Stat Med*  
36  
37 2009;**28**(20):2509-30 doi: 10.1002/sim.3639[published Online First: Epub  
38  
39 Date]].  
40

41  
42 58. Gardiner JC, Luo Z, Roman LA. Fixed effects, random effects and GEE: what are  
43  
44 the differences? *Stat Med* 2009;**28**(2):221-39 doi:  
45  
46 10.1002/sim.3478[published Online First: Epub Date]].  
47  
48

49  
50 59. Follman D. Multivariate tests for multiple endpoints in clinical trials. *Stat Med*  
51  
52 1995;**14**:1163-75  
53  
54  
55  
56  
57  
58  
59  
60

**FUNDING STATEMENT**

The primary sources for funding for this project are grants from NIMHD (3P60MD000206, 3P60MD000206-08S1, and 3P60MD000206-09S2). Partial support for development of this project was provided by a Collaborative and Multidisciplinary Pilot Research Award (CaMPR) from the Irving Institute of Clinical Translational Research at Columbia University Medical Center, funded by a Clinical Translational Science Award (UL1 RR024156). The content is solely the responsibility of the authors and does not necessarily represent the official views of the NIH.

**AUTHORS CONTRIBUTIONS**

JAL is the study principal investigator and was responsible for obtaining funding, designing the study, and drafting this manuscript; M. Mittelman is the study co-principal investigator and was responsible for co-designing the study, designing the NYUCI implementation, and drafting this manuscript; M. Mejia was responsible for designing the CHW intervention; RL was responsible for developing bioinformatics strategies for participant recruitment. SS was responsible for aiding in the design of the study logistics; JK was responsible for sample size calculations and the statistical analysis plan; MR was responsible for the design of study logistics and questionnaires; JT is the leader of the data coordinating center and was responsible for the overall study design, the statistical plan, and drafting of this manuscript.

All authors read and approved the final manuscript.

**COMPETING INTERESTS:**

Mary Mittelman is the developer of the NYUCI and has received consulting fees for training providers. She is currently working on a Small Business Innovation Research

grant to develop online training for the NYUCI. It is possible that Dr. Mittelman will benefit in the future from the distribution of NYUCI training materials.

The other author(s) declare that they have no competing interests

#### ACKNOWLEDGEMENTS:

We would like to express our gratitude to the New York City Chapter of the Alzheimer's Association, the Washington Heights Inwood Council on Aging, New York Presbyterian Hospital, and the Hebrew Home for the Aged for supporting the outreach and recruitment activities related to this project. We would also like to thank Gabriela Torres-Patino and Dante Tapiani for carrying out the project and collecting data cited in this manuscript.

Table 1. Assumptions for power calculations and effect sizes for MANOVA.

|                                                                                                                                             |                                                                                  |
|---------------------------------------------------------------------------------------------------------------------------------------------|----------------------------------------------------------------------------------|
| MANOVA Assumptions: $\sigma = 9.8$ , $\alpha = 0.05$ ,<br>R (reliability) = 0.85; g=2 groups, 1-<br>$\beta = 0.80$ , M=80/group, 2 outcomes | Point reduction in the<br>intervention relative<br>to control group ( $\delta$ ) |
|---------------------------------------------------------------------------------------------------------------------------------------------|----------------------------------------------------------------------------------|

|                                         |                     |
|-----------------------------------------|---------------------|
| $\rho$ (correlation between waves) =0.5 | 5.30 (Cohen d=0.54) |
| $\rho=0.6$                              | 4.75 (Cohen d=0.48) |
| $\rho=0.7$                              | 4.10 (Cohen d=0.42) |

Table 2. Power for MANOVA examined under several scenarios regarding the non-centrality parameter.

| (80/group) | $\rho=0.5$ | $\rho=0.6$ | $\rho=0.7$ |
|------------|------------|------------|------------|
| $f_1^2$    | 0.0553     | 0.0691     | 0.0922     |

|              |      |       |       |
|--------------|------|-------|-------|
| $\lambda$ 's | 8.85 | 11.06 | 14.75 |
|--------------|------|-------|-------|

For peer review only

1  
2  
3  
4  
5  
6  
7  
8  
9  
10  
11  
12  
13  
14  
15  
16  
17  
18  
19  
20  
21  
22  
23  
24  
25  
26  
27  
28  
29  
30  
31  
32  
33  
34  
35  
36  
37  
38  
39  
40  
41  
42  
43  
44  
45  
46  
47  
48  
49  
50  
51  
52  
53  
54  
55  
56  
57  
58  
59  
60

1  
2  
3 Table 3. Summary of effect sizes for different approaches to power calculations (a,b)  
4  
5 Endpoint differences under different assumptions about the correlation between baseline  
6  
7 and endpoint mean values of the outcomes ( $\rho$ ) and (c) Manova under different  
8  
9 scenarios regarding  $\rho$ .  
10  
11  
12  
13

| Method                                            | Effect size( $\Delta/\sigma$ ) |
|---------------------------------------------------|--------------------------------|
| a) 2 group endpoint differences                   | 0.48                           |
| b) 2 group endpoint differences, different $\rho$ | 0.37 to 0.48                   |
| c) Manova (2 groups, $\rho=0.5, 0.6, 0.7$ )       | 0.54, 0.48, 0.42               |

1  
2  
3 Figure 1. Power for examining change over time in the outcomes the Zarit Caregiver  
4 Burden Scale (Zarit) and the Geriatric Depression Scale (GDS).  
5  
6  
7  
8  
9  
10  
11  
12  
13  
14  
15  
16  
17  
18  
19  
20  
21  
22  
23  
24  
25  
26  
27  
28  
29  
30  
31  
32  
33  
34  
35  
36  
37  
38  
39  
40  
41  
42  
43  
44  
45  
46  
47  
48  
49  
50  
51  
52  
53  
54  
55  
56  
57  
58  
59  
60

For peer review only

Figure 1. Power for examining change over time in the outcomes the Zarit Caregiver Burden Scale (Zarit) and the Geriatric Depression Scale (GDS).

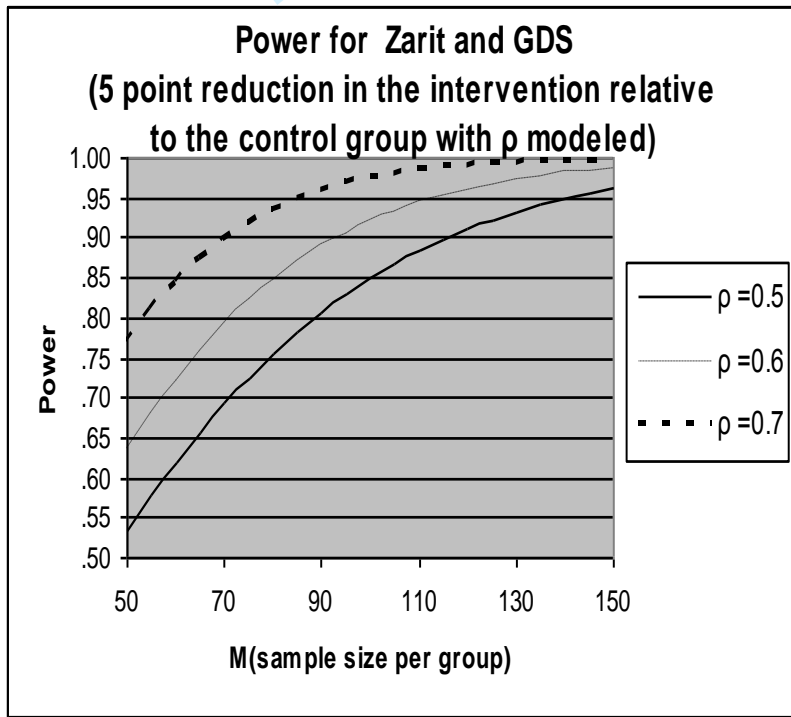

Supplement: bmjopen-2012-001941.draft_revisions.pdf [file bmjopen-2012-001941.draft_revisions.pdf]
